# Supplementary material for: Non-canonical STING–PERK pathway dependent epigenetic regulation of vascular endothelial dysfunction via integrating IRF3 and NF-κB in inflammatory response
Source: PubMed Central journal article supplement — Acta Pharm Sin B. 2023 Aug 17;13(12):4765–84. doi: 10.1016/j.apsb.2023.08.015 (PMC10692388; doi:10.1016/j.apsb.2023.08.015), 2023-08-17
Supplement: mmc1.pdf [file mmc1.pdf]

Supporting Information for

Original article

**Non-canonical STING–PERK pathway dependent epigenetic regulation of vascular endothelial dysfunction *via* integrating IRF3 and NF- $\kappa$ B in inflammatory response**

Xuesong Li<sup>a,†</sup>, Xiang Chen<sup>a,†</sup>, Longbin Zheng<sup>a,b,†</sup>, Minghong Chen<sup>a</sup>, Yunjia Zhang<sup>a</sup>, Ruigong Zhu<sup>a</sup>, Jiajing Chen<sup>c</sup>, Jiaming Gu<sup>a</sup>, Quanwen Yin<sup>a</sup>, Hong Jiang<sup>a</sup>, Xuan Wu<sup>a</sup>, Xian Ji<sup>a</sup>, Xin Tang<sup>a</sup>, Mengdie Dong<sup>a</sup>, Qingguo Li<sup>d,\*</sup>, Yuanqing Gao<sup>a,\*</sup>, Hongshan Chen<sup>a,d,e,f,\*</sup>

<sup>a</sup>Key Laboratory of Cardiovascular and Cerebrovascular Medicine, School of Pharmacy, Nanjing Medical University, Nanjing 211166, China

<sup>b</sup>Department of Anesthesiology, Sir Run Run Hospital, Nanjing Medical University, Nanjing 211166, China

<sup>c</sup>Department of Pharmacy, Huashan Hospital, Fudan University, Shanghai 200040, China

<sup>d</sup>Department of Cardiothoracic Surgery, The Second Affiliated Hospital of Nanjing Medical University, Nanjing 211166, China

<sup>e</sup>Key Laboratory of Targeted Intervention of Cardiovascular Disease, Collaborative Innovation Center for Cardiovascular Disease Translational Medicine, Nanjing Medical University, Nanjing 211166, China

<sup>f</sup>Department of Cardiology, Huai'an First People's Hospital affiliated with Nanjing Medical University, Huai'an 223399, China

Received 10 May 2023; received in revised form 6 July 2023; accepted 2 August 2023

\*Corresponding authors. Tel.: +86 25 86868467.

E-mail addresses: hongshanchen@njmu.edu.cn (Hongshan Chen), yuanqinggao@njmu.edu.cn (Yuanqing Gao), lqg0235062@163.com (Qingguo Li).

<sup>†</sup>These authors made equal contributions to this work.

## 1. Supporting tables

**Table S1** PCR primers used in this study.

| Factor or PTM                 | Forward                           | Reverse                    |
|-------------------------------|-----------------------------------|----------------------------|
|                               | Human                             |                            |
| <i>ISG15</i>                  | CACCTGAAGCAGCAAGTGAG              | ATTTCCGGCCCTTGATCCTG       |
| <i>ISG20</i>                  | CTCTACGCCATCACTGGGTC              | CTCTTCGTCTGATCCGTCCT       |
| <i>MX2</i>                    | TCTGGGGAAAGCTAGGGGAA              | TCTGGGGAAAGCTAGGGGAA       |
| <i>IL-6</i>                   | CCTCCAGAACAGATTTGAGAGTAGT         | GGGTCAGGGGTGGTTATTGC       |
| <i>IL-1<math>\beta</math></i> | TTGCCAGCCAGTGACACAAT              | GAGAAGGTGGTTGTCTGGGAAT     |
| <i>CCL2</i>                   | GATCTCAGTGCAGAGGCTCG              | TCTGGGGAAAGCTAGGGGAA       |
| <i>ICAM-1</i>                 | AGGTTGAACCCACAGTCAC               | TCTGAGACCTCTGGCTTCGT       |
| <i>VCAM-1</i>                 | CACTGAATGGGAAGGTGACG              | ACACTTGA CTGTGATCGGCTT     |
| <i>SELE</i>                   | AAGCTGTGAGATGCGATGCT              | GATCTTTCCCGGA ACTGCCA      |
| <i>MT-ND1</i>                 | CTCTTCGTCTGATCCGTCCT              | TGAGGTTGCGGTCTGTTAGT       |
| <i>MT-ND2</i>                 | GTAGACAGTCCCACCCTCAC              | TTGATCCCGTTTCGTGCAAG       |
| <i>L1ORF1</i>                 | AGAACGCCACAAAGATACTCCTCG          | CTCTCTTCTGGCTTGTAGGGTTTCTG |
| <i>L1ORF2</i>                 | AAACTGAACAACCTGCTCCTGAATG         | CTACACACTGCTTTGAATGCGTCC   |
| <i>RNA18S</i>                 | GTAACCCGTTGAACCCCAT               | CCATCCAATCGGTAGTAGCG       |
|                               | Mice                              |                            |
| <i>Il-6</i>                   | TGATGGATGCTACCAA ACTGGA           | GGAGAGCATTGGAAATTGGGG      |
| <i>Il-1<math>\beta</math></i> | TAATGCTTGAGCCCACCCTG              | GGGGGAGGCTTCTCTACTGA       |
| <i>Ccl2</i>                   | GGCTCAGCCAGATGCAGTTA              | TCATTTGGTTCCGATCCAGGTT     |
| <i>Icam-1</i>                 | AAACCAGACCCTGGA ACTGC             | CCCATGGGAGCTAAAGGCAT       |
| <i>Vcam-1</i>                 | TATGTCAACGTTGCCCCAA               | AAATGCCGGAATCGTCCCTT       |
| <i>Sele</i>                   | ATGGAAGCCTGAACTGCTCC              | TGTCGTGTTCCATGGGTAGC       |
| <i>mt-Nd1</i>                 | CAAACACTTATTACAACCCAAGAACA        | TCATATTATGGCTATGGGT CAGG   |
| <i>mt-Nd2</i>                 | CCATCAACTCAATCTCACTTCTATG         | GAATCCTGTTAGTGGTGGAAGG     |
| <i>L1 gDNA</i>                | TAGGAAATTAGTTT<br>GAATAGGTGAGAGGT | TCCAGAAGCTGTCAGGTTCTCTGGC  |
| <i>Sting</i>                  | TCGCACGAACTTGGACTACTG             | CCA ACTGAGGTATATGTCAGCAG   |

**Table S2** Clinical characteristics of the patients recruited are shown.

| Type                                 | Patient | Sex    | Age | Approach                       | Size (mm) | Location                      | Calcification |
|--------------------------------------|---------|--------|-----|--------------------------------|-----------|-------------------------------|---------------|
| Atherosclerotic aortic specimens     | 1       | Female | 65  | Endarterectomy specimens       | 6 × 10    | Carotid intima                | No            |
|                                      | 2       | Male   | 57  | Endarterectomy specimens       | 8 × 20    | Carotid intima                | No            |
|                                      | 3       | Male   | 60  | Endarterectomy specimens       | 5 × 14    | Carotid intima                | No            |
| Non-atherosclerotic aortic specimens | 1       | Male   | 53  | Coronary artery bypass surgery | 20 × 10   | Left internal thoracic artery | No            |
|                                      | 2       | Female | 48  | Heart transplantation          | 45 × 10   | Aortic arch                   | No            |
|                                      | 3       | Male   | 64  | Coronary artery bypass surgery | 5 × 10    | Left internal thoracic artery | No            |

**Table S3** Antibodies used in this study.

| Factor or PTM                                 | Vendor                    | Cat Number |
|-----------------------------------------------|---------------------------|------------|
| <i>p-STING</i>                                | Cell Signaling Technology | 50907S     |
| <i>p-STING</i>                                | Cell Signaling Technology | 72971      |
| <i>STING</i>                                  | Cell Signaling Technology | 13647      |
| <i>STING</i>                                  | Invitrogen                | PA5-20782  |
| <i>p-TBK1</i>                                 | Cell Signaling Technology | 5483T      |
| <i>TBK1</i>                                   | Cell Signaling Technology | 38066      |
| <i>p-IRF3</i>                                 | Cell Signaling Technology | 29047      |
| <i>IRF3</i>                                   | Invitrogen                | 712217     |
| <i>IRF3</i>                                   | Proteintech               | 11312-1-AP |
| <i>Actin</i>                                  | Bioworld                  | AP0060     |
| <i>IgG</i>                                    | Cell Signaling Technology | 3900       |
| <i>cGAS</i>                                   | Santa                     | sc-515777  |
| <i>p-p65</i>                                  | Cell Signaling Technology | 3033       |
| <i>p65</i>                                    | Cell Signaling Technology | 8242       |
| <i>BRD2</i>                                   | Cell Signaling Technology | 5848S      |
| <i>BRD3</i>                                   | Invitrogen                | PA5-30263  |
| <i>BRD4</i>                                   | Abcam                     | ab243862   |
| <i>H3K27ac</i>                                | Abcam                     | ab177178   |
| <i>H3K4me1</i>                                | Abcam                     | ab176844   |
| <i>H3K27me3</i>                               | Abcam                     | ab6002     |
| <i>H3</i>                                     | Abcam                     | ab1791     |
| <i>ICAM-1</i>                                 | Santa                     | sc-8439    |
| <i>VCAM-1</i>                                 | Abcam                     | ab134047   |
| <i>dsDNA</i>                                  | Abcam                     | ab27156    |
| <i>dsDNA</i>                                  | Abcam                     | ab273137   |
| <i>Tomm20</i>                                 | Abcam                     | ab-78547   |
| <i>Tomm20</i>                                 | Proteintech               | 11802-1-AP |
| <i>VDAC1</i>                                  | Abcam                     | ab14734    |
| <i>CD31</i>                                   | Abcam                     | ab24590    |
| HRP-conjugated anti-rabbit secondary antibody | goatJackson Labs          | 111035003  |
| HRP-conjugated anti-mouse secondary antibody  | goatJackson Labs          | 115036003  |

**Table S4** ChIP primers used in this study.

| Primer set name                       | Forward sequence        | Reverse sequence      |
|---------------------------------------|-------------------------|-----------------------|
| Human                                 |                         |                       |
| <i>ICAM-1 (-1 kb)</i>                 | GTGGATGTCGAGTCTTGGGG    | CAACTCGAACCCAGGCTCAT  |
| <i>ICAM-1 (p)</i>                     | GGGGCTAGAGACAGCGATT     | CTTGTTGGGTTGGCACAGAG  |
| <i>ICAM-1 (+1 kb)</i>                 | CGTGTCTGTGTGAGTGGG      | TTTTCTGGCCACGTCCAGTT  |
| <i>VCAM-1 (-1 kb)</i>                 | AACTTGGCTGGGTGTCTGTT    | TCTTGTTCAGAGGCGGAG    |
| <i>VCAM-1 (p)</i>                     | GCTCAGATTGGTGACTCCGT    | GCTCTCTCATGTTGGCCTT   |
| <i>VCAM-1 (+1 kb)</i>                 | GGCGCTATACCATCCGAAA     | ACCACAGCTCCATTTTGCCA  |
| <i>IL-6 (-1 kb)</i>                   | CCTTAGAGCCTGGTGTCTGC    | TCTGGGGGTTGGAGATGGAT  |
| <i>IL-6 (p)</i>                       | ATAGCCCAGAGCATCCCTCC    | GCTACATTTGCCGAAGAGCC  |
| <i>IL-6 (+1 kb)</i>                   | CTATCCGGCCCAAGCTTTCT    | TGGCCCATTTGGGTTTCTCA  |
| <i>IL-1<math>\beta</math> (-1 kb)</i> | GGCTAGGGTAACAGCACCTG    | CTGGGGCAGAGAACATACGG  |
| <i>IL-1<math>\beta</math> (p)</i>     | CCAGCTCTCCTAGCCAATAC    | TGAGTGACTTCCCCATGACG  |
| <i>IL-1<math>\beta</math> (+1 kb)</i> | TGTACCTGTCTGCGTGTTG     | CCAGCTTTTCTAGGGATGGG  |
| <i>CCL2 (-1 kb)</i>                   | CCCGGGGTAAGTCTGAGGATTC  | TAGGCTCTGGCACAAACCTG  |
| <i>CCL2 (p)</i>                       | AGCATGAAAGTCTCTGCCGC    | GAGAAGAAGAGGGGGCCTTAC |
| <i>CCL2 (+1 kb)</i>                   | TGGGAAAAGTCTGAGGCACCAAG | CCATTCTGCACCAAAGGGCT  |
| <i>SELE (-1 kb)</i>                   | TGAACACAGAAAGACCAGTGCT  | ACTGTCAGCAGACCTGAACG  |
| <i>SELE (p)</i>                       | GGTAGCACCATCTCACGTCC    | ATGACACCATCTGCACCAGG  |
| <i>SELE (+1 kb)</i>                   | AGCCATGCTTGTGCTCTGAT    | CCCTGCTCCCTCCCTAAGAT  |
| Mice                                  |                         |                       |
| <i>Icam-1 (-1 kb)</i>                 | CTAGTGCCAAGTGGGTGGAG    | TTAACCCACCAGACATGCCC  |
| <i>Icam-1 (p)</i>                     | TAACGGGAAGTGGGATTGGA    | ACCCATGGAGTGATGCTACG  |
| <i>Icam-1 (+1 kb)</i>                 | TCTGTCTTACCACACAGACCA   | CATCACGAGGCCCAATGA    |

**Table S5** siRNA sequences used in this study.

| Factor or PTM  | Forward sequence      | Reverse sequence       |
|----------------|-----------------------|------------------------|
| <i>STING-1</i> | GCAGCUGGGACUGCUGUAAA  | UAACAGCAGUCCCAGCUGCAG  |
| <i>STING-2</i> | GCAGAGCUAUUCCUCCACA   | UGGAAGGAAAUAGCUCUGCUG  |
| <i>STING-3</i> | GCAUUACAACAACCUGCUACG | UAGCAGGUUGUUGAAUUGCUG  |
| <i>IRF3-1</i>  | GGCUGGUGUCGACGUGGACC  | UCCAGCUGCGACACCAGCCAG  |
| <i>IRF3-2</i>  | GGAGCAAGGACCCUCACGACC | UCGUGAGGGUCCUUGCUCGGG  |
| <i>IRF3-3</i>  | GCCUCGAGUUUGAGAGCUACC | UAGCUCUCAAAACUCGAGGCUG |
| <i>p65-1</i>   | AGCGCAUCCAGACCAACAACA | UUGUUGGUCUGGAUGCGCUGA  |
| <i>p65-2</i>   | UGGAUUCAUUACAGCUUAAUC | UUAAGCUGUAAUGAAUCCAUG  |
| <i>p65-3</i>   | GCUGCAGUUUGAUGAUGAAGA | UUCAUCAUCAAAACUCGAGCUG |
| <i>BRD4-1</i>  | AGCCAAGAGGCAGACCAACC  | UUGGUCUGCCUCUUGGGCUUG  |
| <i>BRD4-2</i>  | GAAGAAACCGAGAUGAUGAUA | UCAUGAUCUCGGUUUCUUCUG  |
| <i>BRD4-3</i>  | GAUGUAAGAUACAAGUAUAUA | UAUACUUGUAUCUUAUCAUCU  |

## 2. Supporting figures

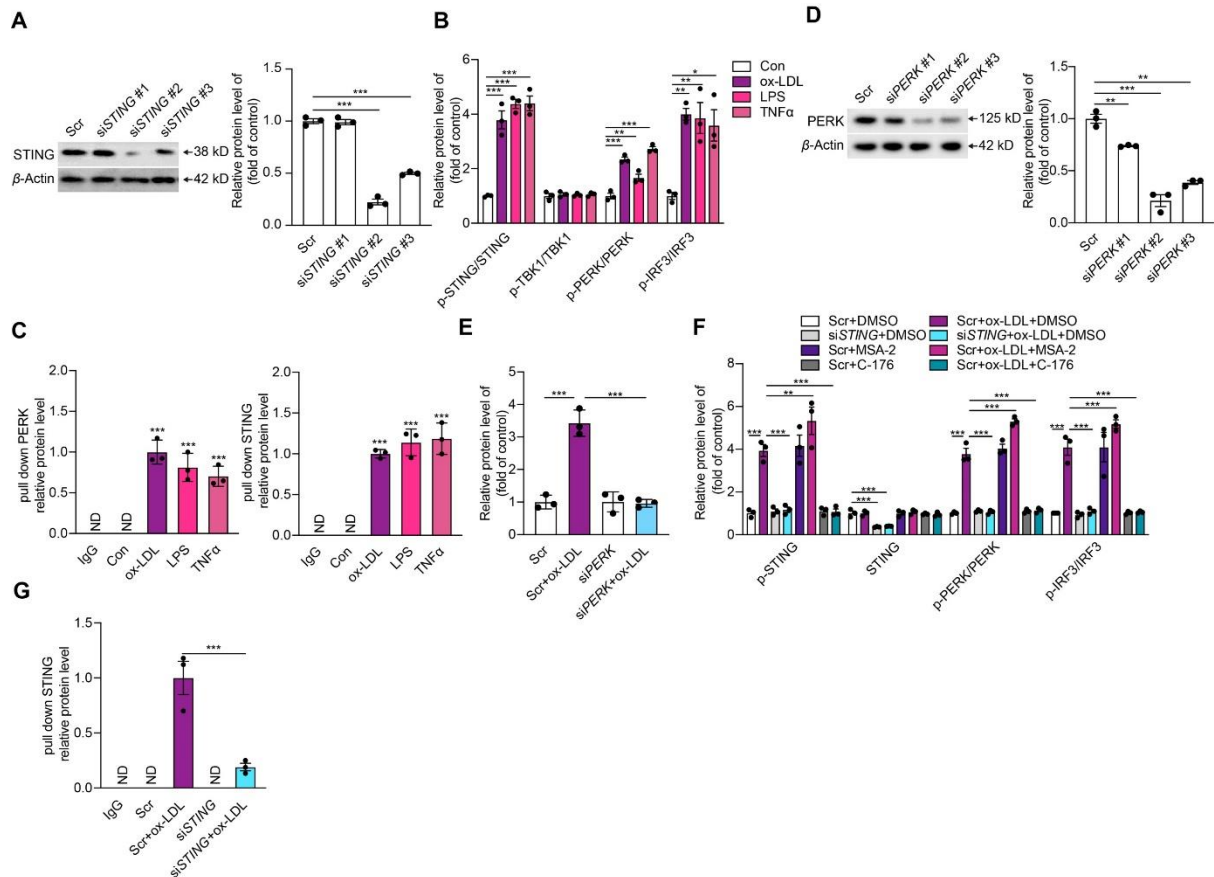

**Figure S1** Activation of the non-canonical STING–PERK pathway in ox-LDL induced endothelial injury. (A) Western blot analysis of interference efficiency targeting STING in HCAECs. (B) Quantification of western blot data of Fig. 1F. (C) Quantification of western blot data from Fig. 1G. (D) Western blot analysis of interference efficiency targeting PERK in HCAECs. (E) Quantification of western blot data from Fig. 1H (p-IRF3/IRF3). (F) Quantification of western blot data from Fig. 1J. (G) Quantification of western blot data from Fig. 1K. Data are shown as mean  $\pm$  SEM,  $n = 3$ ; \* $P < 0.05$ , \*\* $P < 0.01$ , \*\*\* $P < 0.001$ ; ND, not detected.

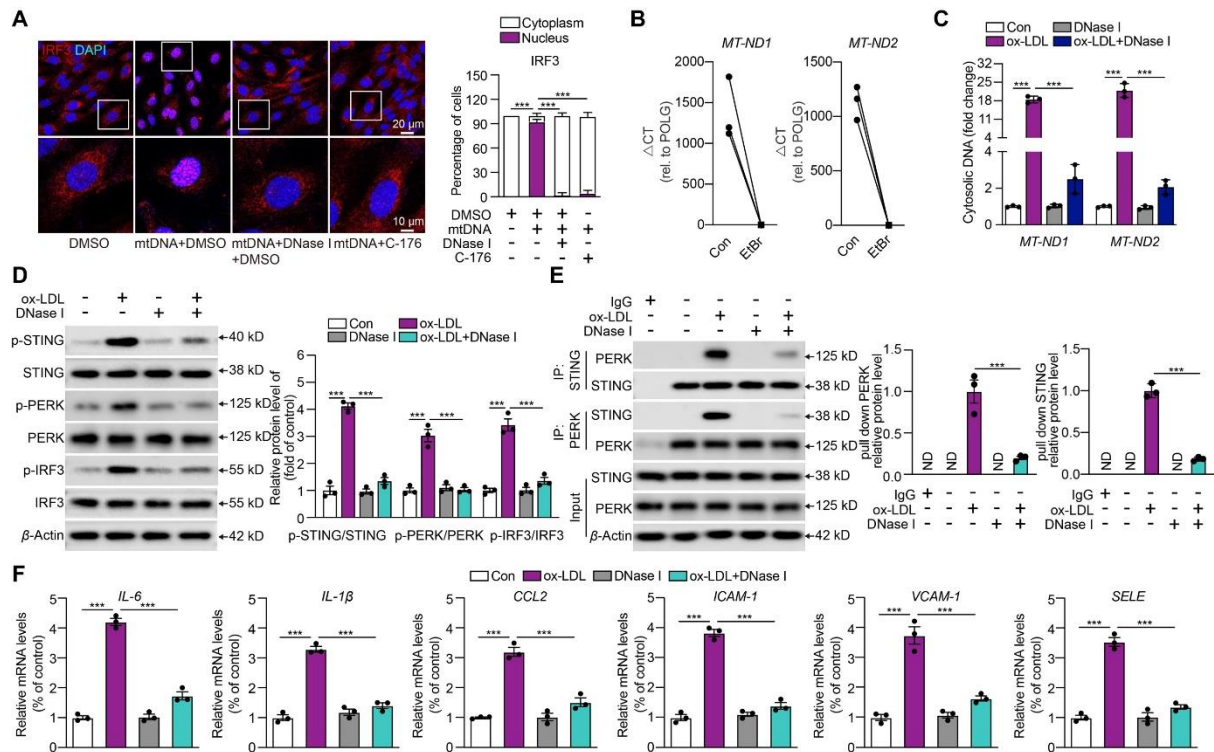

**Figure S2** DNase I could effectively ameliorate the oxidized LDL-induced endothelial injury *via* inhibiting the non-canonical STING–PERK pathway activation. (A) Immunofluorescence staining of IRF3 (Scale bar = 20  $\mu$ m). (B) qPCR analysis of mtDNA deletion efficiency by EtBr. (C) The qPCR analysis of the cytoplasmic mtDNA content of ox-LDL-treated HCAECs combined with DNase I (1  $\mu$ g/mL). (D)–(F) Western blot analysis of the non-canonical STING–PERK pathway (D), co-immunoprecipitation analysis of STING-PERK binding (E), and adhesions molecules and chemokines mRNA expression (F) in ox-LDL-treated HCAECs combined with DNase I. Data are shown as mean  $\pm$  SEM,  $n = 3$ ; \*\*\* $P < 0.001$ ; ND, not detected.

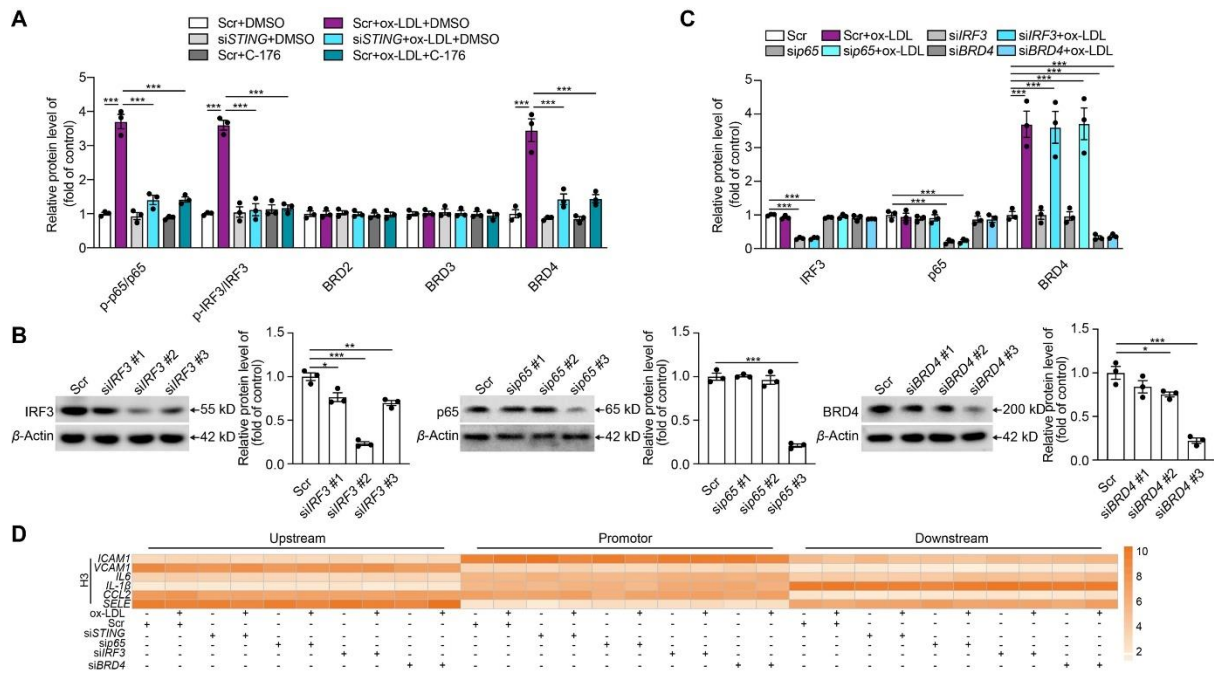

**Figure S3** The interference efficiency of proteins. (A) Quantification of western blot data of Fig. 4B. (B) Western blot analysis of interference efficiency targeting IRF3, p65 and BRD4 in HCAECs. (C) Quantification of western blot data of Fig. 4C. (D) H3 was pulled down as the ChIP control for the tested proteins (Fig. 4D). Data are shown as mean  $\pm$  SEM,  $n = 3$ ; \* $P < 0.05$ , \*\* $P < 0.01$ , \*\*\* $P < 0.001$ .

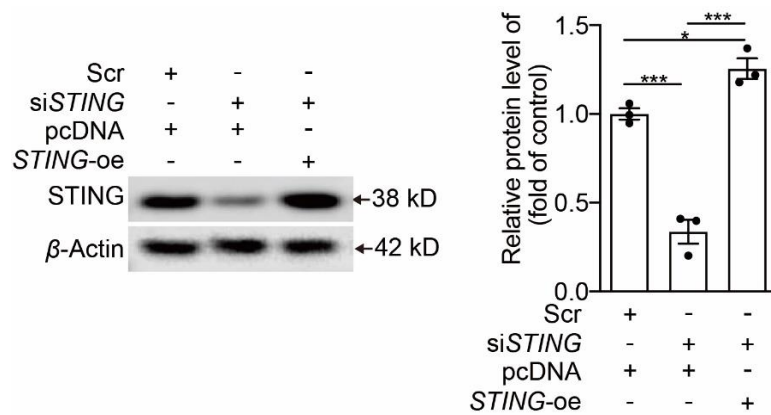

**Figure S4** Western blot analysis of interference efficiency and overexpression efficiency targeting STING in HCAECs. Data are shown as mean  $\pm$  SEM,  $n = 3$ ; \* $P < 0.05$ , \*\*\* $P < 0.001$ .

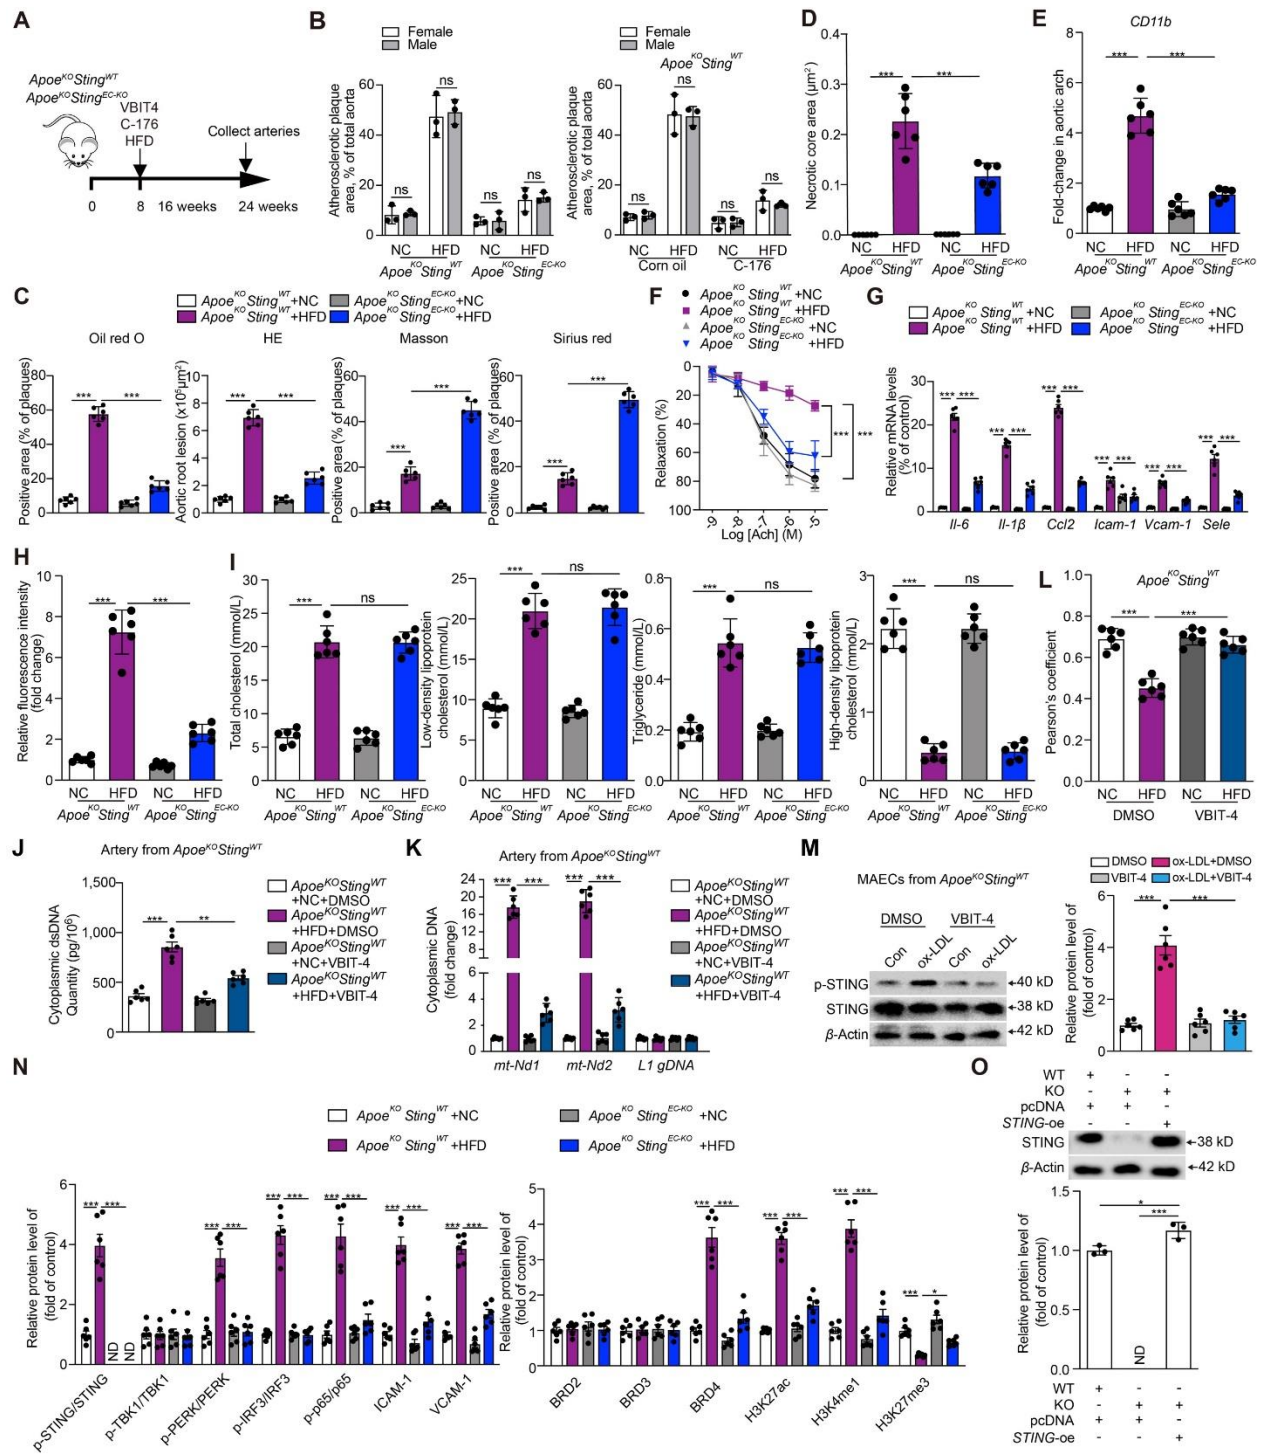

**Figure S5** Endothelial deletion of STING could reverse the enhanced atherosclerotic lesions in *Apoe<sup>KO</sup>Sting<sup>WT</sup>* mice. (A) Study design. (B) The quantification of atherosclerotic plaque area of female and male *Apoe<sup>KO</sup>* mice in each group treated as the Fig. 6A. (C) Quantification of oil red O, HE, Masson and Sirius red in Fig. 6B. (D) Quantification of necrotic core area of HE staining of aortic root of Fig. 6B. (E) The qRT-PCR analysis for the leukocyte marker CD11b on aortic arches of mice treated as Fig. 6B. (F)–(G) Ach-mediated endothelium-dependent relaxation (F), mRNA levels of inflammatory genes (G), in arteries from *Apoe<sup>KO</sup>Sting<sup>WT</sup>* and *Apoe<sup>KO</sup>Sting<sup>EC-KO</sup>* mice fed with NC or HFD. (H) The quantification of ICAM-1 in



endothelium from *Apoe<sup>KO</sup>Sting<sup>WT</sup>* and *Apoe<sup>KO</sup>Sting<sup>EC-KO</sup>* mice fed with NC or HFD in Fig. 6C. (I) The plasma content of total cholesterol, low density lipoprotein cholesterol, triglycerides and high density lipoprotein cholesterol from *Apoe<sup>KO</sup>Sting<sup>WT</sup>* and *Apoe<sup>KO</sup>Sting<sup>EC-KO</sup>* mice fed with NC or HFD. (J)–(K) The cytoplasmic dsDNA concentration (J), the cytoplasmic expression of mtDNA, nuclear LINE1 elements and *RNA 18S* by qPCR (K) in the arteries from *Apoe<sup>KO</sup>Sting<sup>WT</sup>* mice fed with NC or HFD combined with VBIT-4. (L) Colocalization of mitochondria marker TOMM20 with dsDNA in Fig. 6H, measured using the Pearson's correlation coefficient. (M) The protein levels of total and phosphorylated STING in MAECs derived from *Apoe<sup>KO</sup>Sting<sup>WT</sup>* mouse thoracic aorta treated with ox-LDL and VBIT-4. (N) Quantification of western blot data of Fig. 6L. (O) Western blot analysis of overexpression efficiency targeting STING in MAECs from *Apoe<sup>KO</sup>Sting<sup>EC-KO</sup>* mice. Data are shown as mean  $\pm$  SEM,  $n = 6$ ; \* $P < 0.05$ , \*\* $P < 0.01$ , \*\*\* $P < 0.001$ ; ND, not detected; ns, no significance.

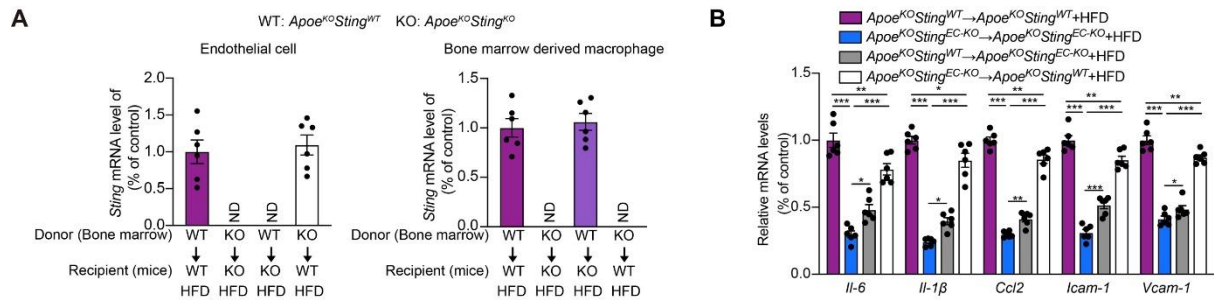

**Figure S6** STING in endothelial cells plays a more important role than macrophages in promoting artery inflammation. (A) The *Sting* expression in endothelium and bone marrow derived macrophage of *Apoe<sup>KO</sup>Sting<sup>WT</sup>* and *Apoe<sup>KO</sup>Sting<sup>EC-KO</sup>* mice involved in bone marrow transplantation by qRT-PCR. (B) Relative mRNA levels of inflammatory genes of aortas from *ApoE<sup>KO</sup>* mice treated as in (Fig. 6O). Data are shown as mean  $\pm$  SEM,  $n = 6$ ; \* $P < 0.05$ , \*\* $P < 0.01$ , \*\*\* $P < 0.001$ ; ND, not detected.

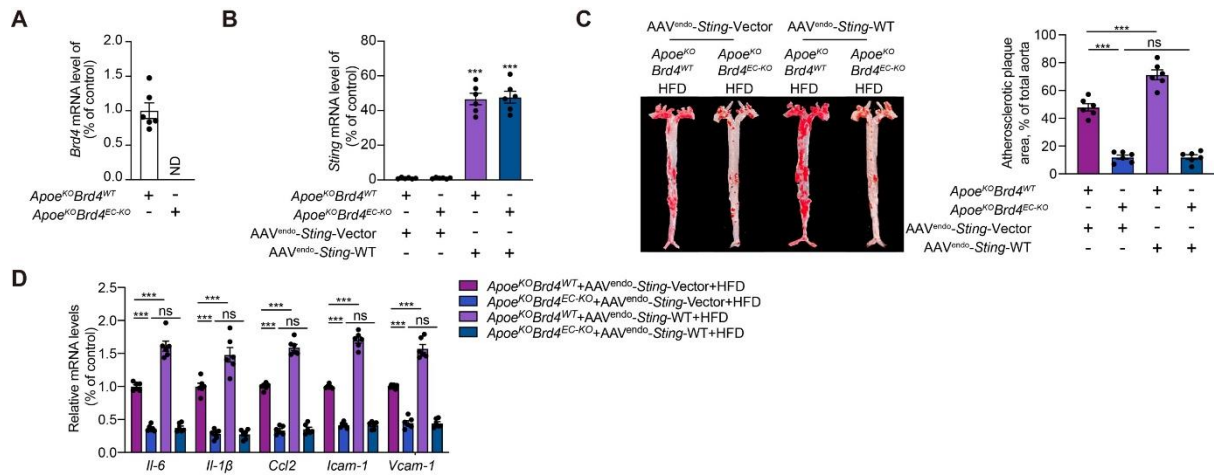

**Figure S7** Endothelium overexpression of STING by AAV<sup>endo</sup> could eliminate the decreased atherosclerotic lesions in *Apoe*<sup>KO</sup>*Brd4*<sup>EC-KO</sup> mice. (A) Relative *Brd4* mRNA level in the endothelium of *Apoe*<sup>KO</sup>*Brd4*<sup>WT</sup> and *Apoe*<sup>KO</sup>*Brd4*<sup>EC-KO</sup> mice. (B) Relative *Sting* mRNA level in the endothelium of *Apoe*<sup>KO</sup>*Brd4*<sup>WT</sup> and *Apoe*<sup>KO</sup>*Brd4*<sup>EC-KO</sup> mice transfected with AAV<sup>endo</sup>-*Sting*-Vector and AAV<sup>endo</sup>-*Sting*-WT. (C) Representative images of en face aortas stained with oil red O from *Apoe*<sup>KO</sup>*Brd4*<sup>WT</sup> and *Apoe*<sup>KO</sup>*Brd4*<sup>EC-KO</sup> mice fed with HFD transfected with AAV<sup>endo</sup>-*Sting*-Vector and AAV<sup>endo</sup>-*Sting*-WT. (D) The mRNA levels of inflammatory genes of aortas from *Apoe*<sup>KO</sup> mice treated as in Supporting Information Fig. S7C. Data are shown as mean ± SEM,  $n = 6$ ; \*\*\* $P < 0.001$ ; ND, not detected; ns, no significance.
